# Supplementary material for: Towards All-Non-Vacuum-Processed Photovoltaic Systems: A Water-Based Screen-Printed Cu(In,Ga)Se2 Photoabsorber with a 6.6% Efficiency
Source: MDPI journal article supplement (doi:10.3390/nano13131920), 2023-06-23
Supplement: s1 [file s1]

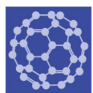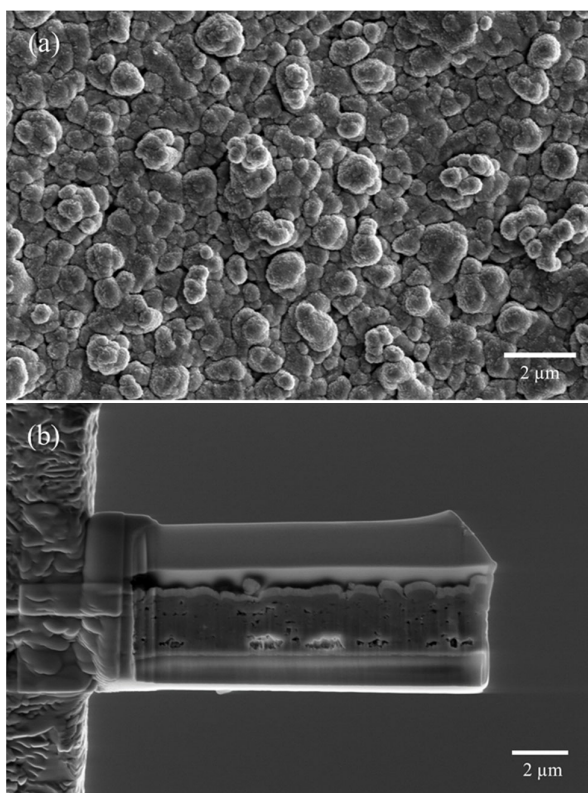

**Figure S1.** SEM images of SLG/FTO/CIGS/CdS/i-ZnO/AZO PV cell: (a) top surface and (b) FIB lamella preparation for cross-sectional imaging.

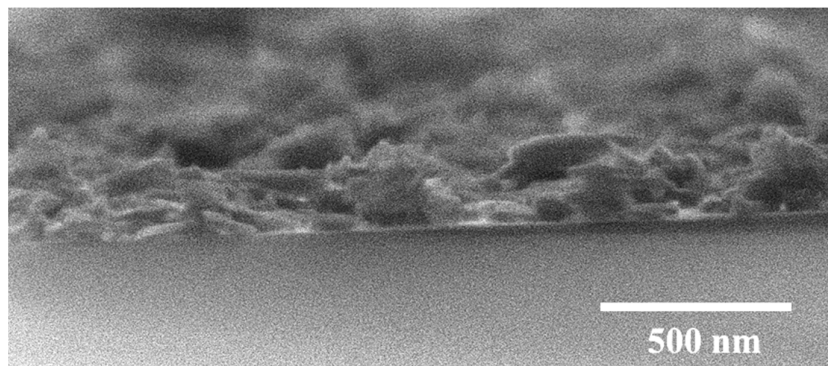

**Figure S2.** Cross-sectional image of spray-coated i-ZnO layer.

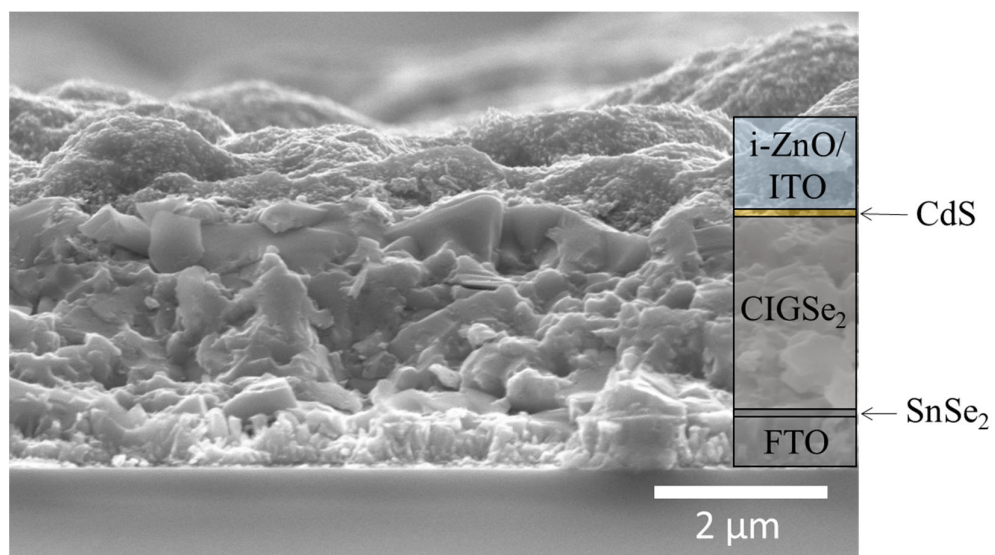

**Figure S3.** Cross-sectional SEM imaging of the all-non-vacuum processed CIGS PV cell.

**Table S1.** Photovoltaic parameters of PV cells fabricated from screen-printed photoabsorber layer and sputtered i-ZnO and AZO layers.

| PV cell            | Efficiency (%) | FF (%) | $J_{sc}$ (mA cm <sup>-2</sup> ) | $V_{oc}$ (V) |
|--------------------|----------------|--------|---------------------------------|--------------|
| 1                  | 4.9            | 39.2   | 36.0                            | 0.33         |
| 2                  | 3.6            | 52.1   | 18.4                            | 0.36         |
| 3                  | 3.6            | 50.8   | 19.7                            | 0.34         |
| 4                  | 6.6            | 50.2   | 36.7                            | 0.34         |
| 5                  | 4.3            | 49.5   | 24.0                            | 0.35         |
| 6                  | 4.5            | 44.5   | 28.6                            | 0.34         |
| 7                  | 4.8            | 37.8   | 36.5                            | 0.33         |
| 8                  | 3.8            | 39.2   | 28.5                            | 0.33         |
| 9                  | 4.1            | 34.0   | 33.8                            | 0.34         |
| 10                 | 4.6            | 35.3   | 36.6                            | 0.34         |
| Average            | 4.5            | 43.3   | 29.9                            | 0.34         |
| Standard Deviation | 0.9            | 7.0    | 7.2                             | 0.01         |

**Table S2.** Photovoltaic parameters of the PV cells fabricated by screen-printing of photoabsorber layer, spray-coated i-ZnO, and sputtered ITO layer.

| PV cell            | Efficiency (%) | FF (%) | $J_{sc}$ (mA cm <sup>-2</sup> ) | $V_{oc}$ (V) |
|--------------------|----------------|--------|---------------------------------|--------------|
| 1                  | 5.6            | 69.0   | 20.3                            | 0.39         |
| 2                  | 4.2            | 62.3   | 17.5                            | 0.38         |
| 3                  | 5.3            | 56.7   | 24.5                            | 0.37         |
| 4                  | 5.5            | 57.2   | 23.9                            | 0.39         |
| 5                  | 4.1            | 61.9   | 16.7                            | 0.39         |
| 6                  | 4.5            | 54.6   | 20.6                            | 0.39         |
| 7                  | 4.3            | 52.3   | 20.4                            | 0.39         |
| 8                  | 4.5            | 56.5   | 20.3                            | 0.38         |
| 9                  | 4.3            | 50.9   | 20.6                            | 0.40         |
| 10                 | 4.5            | 55.0   | 20.0                            | 0.39         |
| Average            | 4.7            | 57.6   | 20.5                            | 0.39         |
| Standard Deviation | 0.6            | 5.4    | 2.4                             | 0.01         |

**Table S3.** Photovoltaic parameters of PV cells fabricated by screen-printing of photoabsorber layer, and spray-coated i-ZnO and ITO layers.

| PV cell            | Efficiency (%) | FF (%) | $J_{sc}$ (mA cm <sup>-2</sup> ) | $V_{oc}$ (V) |
|--------------------|----------------|--------|---------------------------------|--------------|
| 1                  | 1.6            | 71.9   | 6.6                             | 0.34         |
| 2                  | 1.5            | 78.1   | 5.2                             | 0.36         |
| 3                  | 1.4            | 76.8   | 5.2                             | 0.33         |
| 4                  | 1.4            | 77.8   | 5.0                             | 0.36         |
| 5                  | 1.6            | 79.9   | 5.3                             | 0.36         |
| 6                  | 1.7            | 70.6   | 7.2                             | 0.32         |
| 7                  | 1.5            | 72.5   | 6.6                             | 0.31         |
| 8                  | 1.7            | 71.4   | 7.4                             | 0.31         |
| 9                  | 1.8            | 73.8   | 7.6                             | 0.32         |
| 10                 | 2.2            | 67.5   | 9.4                             | 0.34         |
| Average            | 1.6            | 74.0   | 6.6                             | 0.34         |
| Standard Deviation | 0.2            | 4.0    | 1.4                             | 0.02         |
